# Supplementary material for: Direct Synthesis of MoS2 Nanosheets in Reduced Graphene Oxide Nanoscroll for Enhanced Photodetection
Source: MDPI journal article supplement (doi:10.3390/nano12091581), 2022-05-06
Supplement: s1 [file s1]

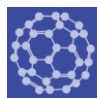

## Supplementary Materials

# Direct Synthesis of MoS<sub>2</sub> Nanosheets in Reduced Graphene Oxide Nanoscroll for Enhanced Photodetection

Zhikang Wu, Feifei Li, Xiya Li, Yang Yang, Xiao Huang \* and Hai Li \*

Key Laboratory of Flexible Electronics (KLOFE), Institute of Advanced Materials (IAM), Nanjing Tech University (Nanjing Tech), 30 South Puzhu Road, Nanjing 211816, China; iamzkwu@njtech.edu.cn (Z.W.); lifeifei@njtech.edu.cn (F.L.); lixiya@njtech.edu.cn (X.L.); iamyyang@njtech.edu.cn (Y.Y.)

\* Correspondence: iamxhuang@njtech.edu.cn (X.H.); iamhli@njtech.edu.cn (H.L.)

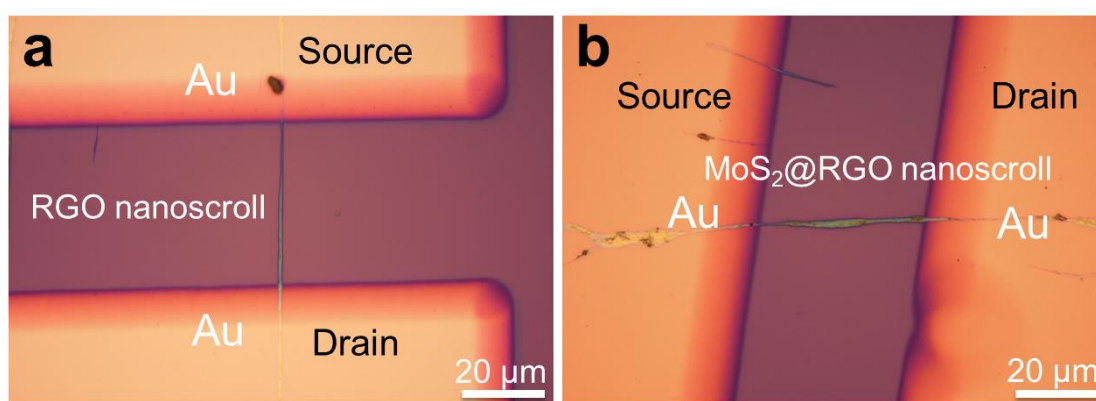

**Figure S1.** The optical images of photodetectors based on individual (a) RGO nanoscroll and (b) MoS<sub>2</sub>@RGO nanoscroll with Au pads as source and drain electrodes.

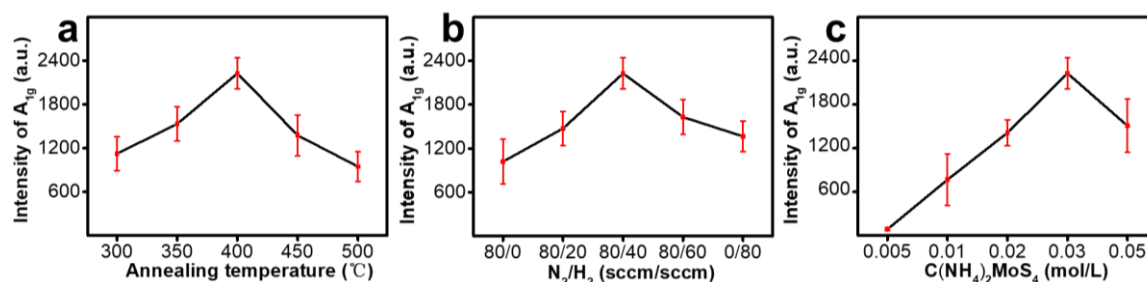

**Figure S2.** Plots of Raman peak intensity of A<sub>1g</sub> as function of (a) annealing temperature, (b) the flow ratio of N<sub>2</sub> to H<sub>2</sub>, and (c) concentration of (NH<sub>4</sub>)<sub>2</sub>MoS<sub>4</sub>.

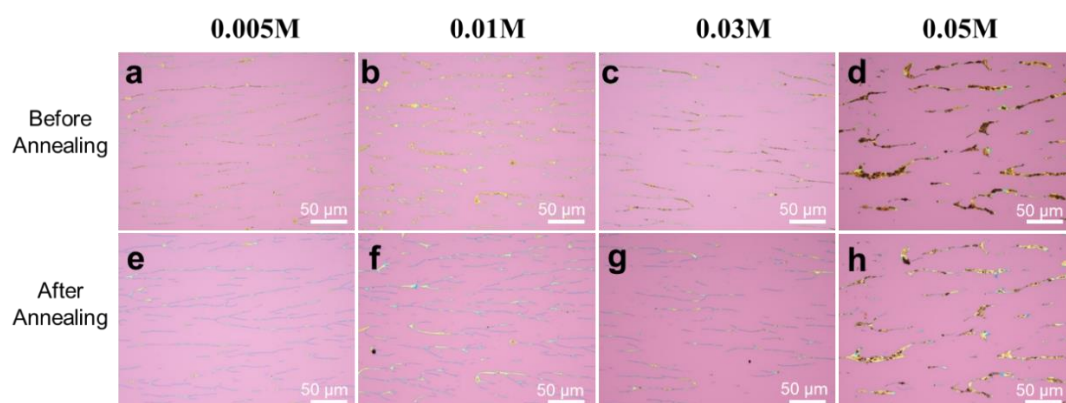

**Figure S3.** OM images of  $(\text{NH}_4)_2\text{MoS}_4$ @GONS prepared by molecular combing  $(\text{NH}_4)_2\text{MoS}_4$  solution with concentration of (a,e) 0.005 M, (b,f) 0.01 M, (c,g) 0.03 M, and (d,h) 0.05 M before and after thermal annealing.

### $(\text{NH}_4)_2\text{MoS}_4$ @GO Nanoscroll $\text{MoS}_2$ @RGO Nanoscroll

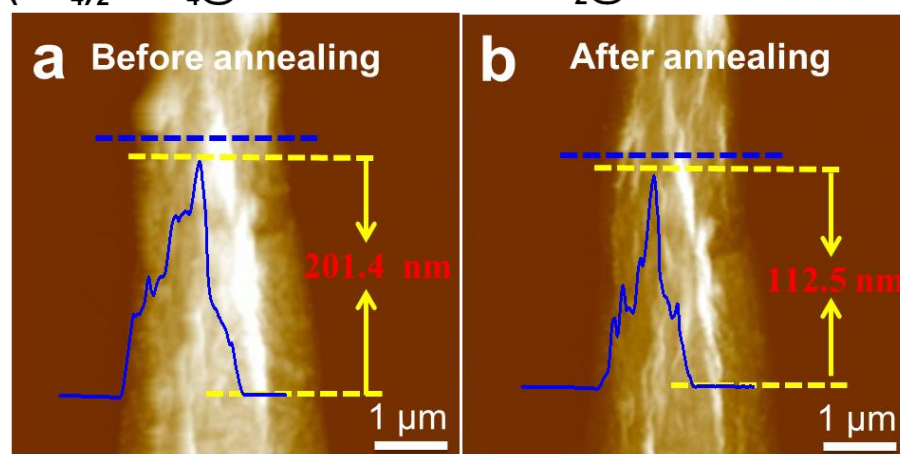

**Figure S4.** AFM height images of the same  $(\text{NH}_4)_2\text{MoS}_4$ @GONS (a) before and (b) after thermal annealing.

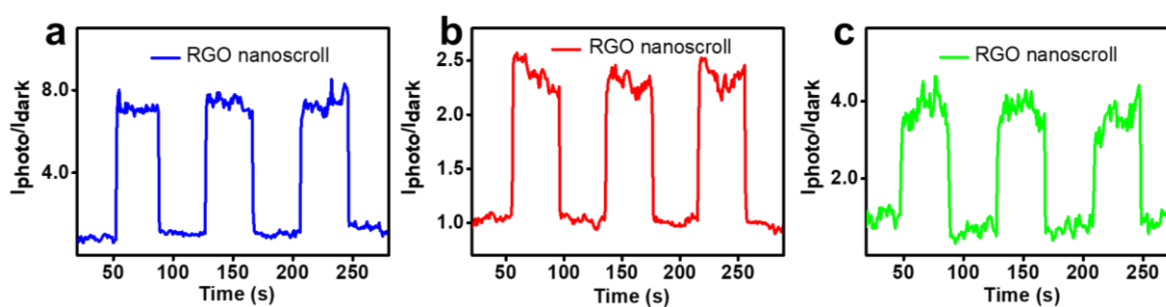

**Figure S5.** PDR plots of RGO nanoscrolls measured under (a) blue, (b) red, and (c) green lasers.
